# Supplementary material for: Model based engineering of Pichia pastoris central metabolism enhances recombinant protein production
Source: PubMed Central journal article supplement — Metab Eng. 2014 Jul;24(100):129–38. doi: 10.1016/j.ymben.2014.05.011 (PMC4094982; doi:10.1016/j.ymben.2014.05.011), 2014-07
Supplement: mmc1.pdf [file mmc1.pdf]

## Supplementary Data

**Table S1: Stoichiometric model for the <sup>13</sup>C flux measurements in OpenFLUX based on the model published by Baumann *et al.* 2010 BMC Syst Biol 4:141**

| RxnID | Reaction Equation                                                      | Carbon transition                                       | Openflux Reaction type |
|-------|------------------------------------------------------------------------|---------------------------------------------------------|------------------------|
| R1    | GLC_EX + ATP = G6P + ADP                                               | abcdef + X = abcdef + X                                 | F                      |
| R2    | G6P = F6P                                                              | abcdef = abcdef                                         | F                      |
| R3    | F6P + ATP = FBP + ADP                                                  | abcdef + X = abcdef + X                                 | F                      |
| R4    | FBP = F6P + Pi                                                         | abcdef = abcdef + X                                     | F                      |
| R5    | FBP = G3P + G3P                                                        | abcdef = abc + def                                      | F                      |
| R6    | G3P + ADP + NAD = PG3 + ATP + NADH                                     | abc + X + X = abc + X + X                               | F                      |
| R7    | PG3 = PEP                                                              | abc = abc                                               | F                      |
| R8    | PEP + ADP = PYR + ATP                                                  | abc + X = abc + X                                       | F                      |
| R9    | PYR + NAD = ACCoA + CO2 + NADH                                         | abc + X = bc + a + X                                    | F                      |
| R10   | PYR + CO2 + ADP = OAA + ATP                                            | abc + d + X = abcd + X                                  | F                      |
| R11   | PYR = AcO + CO2                                                        | abc = bc + a                                            | F                      |
| R12   | G6P + NADP = RUL5P + CO2 + NADPH                                       | abcdef + X = bcdef + a + X                              | F                      |
| R13   | RUL5P = XYL5P                                                          | abcde = abcde                                           | F                      |
| R14   | XYL5P + ADP = XYL + ATP                                                | abcde + X = abcde + X                                   | F                      |
| R15   | XYL + NADH = AROL + NAD                                                | abcde + X = abcde + X                                   | F                      |
| R16   | RUL5P = RIB5P                                                          | abcde = abcde                                           | F                      |
| R17   | XYL5P + RIB5P = SED7P + G3P                                            | abcde + fghij = fgabcde + hij                           | FR                     |
| R18   | SED7P + G3P = XYL5P + RIB5P                                            | abcdefg + hij = cdefg + abhij                           | R                      |
| R19   | SED7P + G3P = E4P + F6P                                                | abcdefg + hij = defg + abchij                           | FR                     |
| R20   | E4P + F6P = SED7P + G3P                                                | abcd + efg hij = efgabcd + hij                          | R                      |
| R21   | XYL5P + E4P = F6P + G3P                                                | abcde + fghi = abfghi + cde                             | FR                     |
| R22   | F6P + G3P = XYL5P + E4P                                                | abcdef + ghi = abghi + cdef                             | R                      |
| R23   | ACCoA + OAA = CIT                                                      | ab + cdef = fedbac                                      | F                      |
| R24   | CIT = ICIT                                                             | abcdef = abcdef                                         | F                      |
| R25   | ICIT + NAD = AKG + CO2 + NADH                                          | abcdef + X = abcde + f + X                              | F                      |
| R26   | AKG + NAD + ADP + FAD = 0.5 SUCC + 0.5 SUCC + CO2 + NADH + FADH2 + ATP | abcde + X + X + X = 0.5 bcde + 0.5 edcb + a + X + X + X | F                      |
| R27   | SUCC + NAD = FUM + NADH                                                | abcd + X = abcd + X                                     | F                      |
| R28   | FUM + H2O = MAL                                                        | abcd + X = abcd                                         | F                      |
| R29   | MAL + NAD = OAA + NADH                                                 | abcd + X = abcd + X                                     | FR                     |
| R30   | OAA + NADH = MAL + NAD                                                 | abcd + X = abcd + X                                     | R                      |
| R31   | ICIT = GLYOXY + 0.5 SUCC + 0.5 SUCC                                    | abcdef = ab + 0.5 fcde + 0.5 edcf                       | F                      |
| R32   | ACCoA + GLYOXY = MAL                                                   | ab + cd = cdba                                          | F                      |
| R33   | AcO + NADH = ETOH + NAD                                                | ab + X = ab + X                                         | F                      |
| R34   | AcO + ATP = Ac + ADP                                                   | ab + X = ab + X                                         | F                      |
| R35   | AcO + NADP + CoA + ATP = ACCoA + NADPH + Pi + AMP                      | ab + X + X + X = ab + X + X + X                         | F                      |
| R36   | G3P + NADH + ATP = GLYO + Pi + ADP + NAD                               | abc + X + X = abc + X + X + X                           | FR                     |
| R37   | GLYO + Pi + ADP + NAD = G3P + ATP + NADH                               | abc + X + X + X = abc + X + X                           | R                      |
| R38   | GLYO = GLYOex                                                          |                                                         | B                      |
| R39   | PYR = PYRex                                                            |                                                         | B                      |
| R40   | CIT = CITex                                                            |                                                         | B                      |

|          |                                                                                   |                                |   |
|----------|-----------------------------------------------------------------------------------|--------------------------------|---|
| R41      | CO2 = CO2ex                                                                       |                                | B |
| R42      | AcO = AcOex                                                                       |                                | B |
| R43      | Ac = Acex                                                                         |                                | B |
| R44      | ETOH = ETOHex                                                                     |                                | B |
| R45      | AROL = AROLex                                                                     |                                | B |
|          | 0.136 PYR + 0.006 RIB5P + 0.013 E4P + 0.040 OAA +                                 |                                |   |
|          | 0.075 AKG + 0.027 ACCoA = Protein + 0.002 G3P +                                   |                                |   |
| R46      | 0.058 CO2                                                                         |                                | B |
| R47      | 0.113 G6P + 0.053 F6P + 0.167 ATP = Carbohydrate + 0.167 ADP                      |                                | B |
|          | 0.002 G6P + 0.0055 PYR + 0.011 G3P + 0.006 CO2 + 0.039 ACCoA + 0.441 ACCoA + 0.07 |                                |   |
|          | NADH + 0.599 NADPH + 0.42 ATP + 0.065 O2 = Lipid + 0.07 NAD + 0.599 NADP + 0.42   |                                |   |
| R48      | ADP + 0.42 Pi                                                                     |                                | B |
|          | 0.056 PYR + 0.1136 CO2 + 0.105 RIB5P + 0.104 NAD + 0.075 NADPH + 1.1 ATP + 0.0479 |                                |   |
| R49      | OAA = RNA + 1.1 Pi + 1.1 ADP + 0.075 NADP + 0.104 NADH                            |                                | B |
|          | 0.051 PYR + 0.132 CO2 + 0.102 RIB5P + 0.102 NAD + 0.273 NADPH + 1.146 ATP + 0.051 |                                |   |
| R50      | OAA = DNA + 1.146 Pi + 1.146 ADP + 0.273 NADP + 0.102 NADH                        |                                | B |
|          | 0.416 Protein + 0.055 RNA + 0.001 DNA + 0.110 Lipid + 0.418 Carbohydrate + ATP =  |                                |   |
| R51 SOD  | Biomass + ADP + Pi                                                                |                                | B |
|          | 0.455 Protein + 0.055 RNA + 0.001 DNA + 0.106 Lipid + 0.383 Carbohydrate + ATP =  |                                |   |
| R51 X-33 | Biomass + ADP + Pi                                                                |                                | B |
| R52      | PYR = ALA                                                                         | abc = abc                      | S |
| R53      | OAA = ASP                                                                         | abcd = abcd                    | S |
| R54      | OAA = ASN                                                                         | abcd = abcd                    | S |
| R55      | AKG = GLU                                                                         | abcde = abcde                  | S |
| R56      | AKG = GLN                                                                         | abcde = abcde                  | S |
| R57      | G3P = 3PG                                                                         | abc = abc                      | S |
| R58      | 3PG = SER                                                                         | abc = abc                      | S |
| R59      | SER = GLY + MTHF                                                                  | abc = ab + c                   | S |
| R60      | OAA = THR                                                                         | abcd = abcd                    | S |
| R61      | THR = GLY + ACETAL                                                                | abcd = ab + cd                 | S |
| R62      | PYR + PYR = VAL + CO2                                                             | abc + def = abefc + d          | S |
| R63      | E4P + PYR = SHKM                                                                  | abcd + efg = efgabcd           | S |
| R64      | SHKM + PYR = CHRM                                                                 | abcdefg + hij = abcdefghij     | S |
| R65      | CHRM = PHE + CO2                                                                  | abcdefghij = hijbcdefg + a     | S |
| R66      | CHRM = TYR + CO2                                                                  | abcdefghij = hijbcdefg + a     | S |
| R67      | CHRM = ANTHR + PYR                                                                | abcdefghij = abcdefg + hij     | S |
| R68      | ANTHR + RIB5P = CPADRIB5P                                                         | abcdefg + hijkl = abcdefghijkl | S |
| R69      | CPADRIB5P = INDG + CO2                                                            | abcdefghijkl = abcdfghijkl + e | S |
| R70      | INDG = IND + G3P                                                                  | abcdefghijk = abcdefgh + ijk   | S |
| R71      | IND + 3PG = TRP                                                                   | abcdefgh + ijk = abcdefghkji   | S |
| R72      | PYR + OAA = ILE + CO2                                                             | abc + defg = debfgc + a        | S |
| R73      | PYR + PYR = ISV + CO2                                                             | abc + def = abefc + d          | S |
| R74      | ISV + ACCoA = LEU + CO2                                                           | abcde + fg = fgbcde + a        | S |
| R75      | AKG + CO2 = ARG                                                                   | abcde + f = abcdef             | S |
| R76      | 3PG = CYS                                                                         | abc = abc                      | S |
| R77      | OAA + MTHF = MET                                                                  | abcd + e = abcde               | S |
| R78      | AKG = PRO                                                                         | abcde = abcde                  | S |
| R79      | AKG + ACCoA = LYS + CO2                                                           | abcde + fg = fgbcde + a        | S |
| R80      | RIB5P + MTHF = HIS                                                                | abcde + f = edcbaf             | S |

**excludedMetabolites**

GLC\_EX  
MeOH\_EX  
ADP  
ATP  
NAD  
NADH  
NADP  
NADPH  
GLYOex  
CO2ex  
ETOHex  
CITex  
PYRex  
FAD  
O2  
FADH2  
AMP  
Biomass  
CoA  
H2O  
Pi  
AROLex  
Acex  
AcOex

**simulatedMDVs**

ALA#111  
ALA#011  
ASP#1111  
ASP#0111  
ASP#1100  
GLU#11111  
GLU#01111  
GLY#11  
GLY#01  
HIS#111111  
HIS#011111  
ILE#011111  
LYS#111111  
LYS#011111  
MET#11111  
MET#01111  
PHE#111111111  
PHE#011111111  
PHE#110000000  
PRO#11111  
PRO#01111  
PRO#01111  
SER#111  
SER#111  
SER#011  
SER#011  
SER#110  
THR#1111  
THR#1111  
THR#0111  
TYR#111111111  
TYR#011111111  
VAL#11111  
VAL#11111  
VAL#01111  
VAL#01111  
VAL#11000

**Table S2: Mass distribution values (MDV) of strain hSOD and X-33 cultivated on a mixture of 17 % <sup>13</sup>C uniformly labelled glucose and 83 % naturally labelled glucose and the respective deviations of 3 biological replicates. hSOD sim and X-33 sim are the respective MDVs of the OpenFLUX fitting yielding the lowest residual error.**

| Fragment | hSOD MDV |   | hSOD dev. | hSOD sim | X-33 MDV |   | X-33 dev. | X-33 sim |
|----------|----------|---|-----------|----------|----------|---|-----------|----------|
| ALA-57   | 0.744    | ± | 0.004     | 0.798    | 0.752    | ± | 0.001     | 0.798    |
|          | 0.092    | ± | 0.003     | 0.042    | 0.079    | ± | 0.001     | 0.043    |
|          | 0.029    | ± | 0.000     | 0.017    | 0.030    | ± | 0.001     | 0.018    |
|          | 0.134    | ± | 0.001     | 0.142    | 0.140    | ± | 0.001     | 0.141    |
| ALA-85   | 0.804    | ± | 0.001     | 0.809    | 0.800    | ± | 0.001     | 0.808    |
|          | 0.042    | ± | 0.000     | 0.048    | 0.039    | ± | 0.000     | 0.048    |
|          | 0.154    | ± | 0.001     | 0.144    | 0.161    | ± | 0.001     | 0.143    |
| ASP-57   | 0.651    | ± | 0.003     | 0.605    | 0.637    | ± | 0.005     | 0.620    |
|          | 0.164    | ± | 0.002     | 0.202    | 0.177    | ± | 0.003     | 0.184    |
|          | 0.079    | ± | 0.001     | 0.125    | 0.060    | ± | 0.001     | 0.117    |
|          | 0.090    | ± | 0.001     | 0.056    | 0.106    | ± | 0.000     | 0.064    |
|          | 0.016    | ± | 0.000     | 0.012    | 0.020    | ± | 0.001     | 0.015    |
| ASP-85   | 0.707    | ± | 0.003     | 0.647    | 0.687    | ± | 0.005     | 0.654    |
|          | 0.147    | ± | 0.002     | 0.223    | 0.154    | ± | 0.004     | 0.210    |
|          | 0.117    | ± | 0.001     | 0.111    | 0.127    | ± | 0.001     | 0.116    |
|          | 0.029    | ± | 0.001     | 0.019    | 0.031    | ± | 0.001     | 0.020    |
| ASPf302  | 0.786    | ± | 0.001     | 0.779    | 0.781    | ± | 0.001     | 0.790    |
|          | 0.092    | ± | 0.001     | 0.106    | 0.086    | ± | 0.000     | 0.086    |
|          | 0.123    | ± | 0.001     | 0.114    | 0.134    | ± | 0.001     | 0.124    |
| GLU-57   | 0.561    | ± | 0.002     | 0.523    | 0.559    | ± | 0.016     | 0.529    |
|          | 0.160    | ± | 0.001     | 0.211    | 0.161    | ± | 0.004     | 0.202    |
|          | 0.196    | ± | 0.001     | 0.194    | 0.194    | ± | 0.005     | 0.197    |
|          | 0.059    | ± | 0.000     | 0.052    | 0.062    | ± | 0.005     | 0.052    |
|          | 0.018    | ± | 0.000     | 0.017    | 0.018    | ± | 0.002     | 0.018    |
|          | 0.006    | ± | 0.000     | 0.003    | 0.006    | ± | 0.001     | 0.003    |
| GLU-159  | 0.607    | ± | 0.002     | 0.584    | 0.609    | ± | 0.013     | 0.595    |
|          | 0.160    | ± | 0.001     | 0.213    | 0.158    | ± | 0.003     | 0.193    |
|          | 0.191    | ± | 0.001     | 0.160    | 0.193    | ± | 0.005     | 0.171    |
|          | 0.027    | ± | 0.000     | 0.034    | 0.026    | ± | 0.002     | 0.031    |
|          | 0.014    | ± | 0.000     | 0.008    | 0.014    | ± | 0.001     | 0.010    |
| GLY-57   | 0.799    | ± | 0.001     | 0.800    | 0.790    | ± | 0.001     | 0.805    |
|          | 0.064    | ± | 0.000     | 0.065    | 0.069    | ± | 0.001     | 0.055    |
|          | 0.138    | ± | 0.001     | 0.135    | 0.141    | ± | 0.000     | 0.140    |
| GLY-85   | 0.833    | ± | 0.001     | 0.833    | 0.826    | ± | 0.002     | 0.833    |
|          | 0.167    | ± | 0.001     | 0.167    | 0.174    | ± | 0.002     | 0.167    |
| HIS-57   | 0.585    | ± | 0.005     | 0.605    | 0.568    | ± | 0.007     | 0.610    |
|          | 0.164    | ± | 0.003     | 0.164    | 0.185    | ± | 0.004     | 0.164    |
|          | 0.069    | ± | 0.001     | 0.064    | 0.069    | ± | 0.001     | 0.060    |
|          | 0.067    | ± | 0.001     | 0.061    | 0.064    | ± | 0.001     | 0.056    |
|          | 0.023    | ± | 0.001     | 0.016    | 0.025    | ± | 0.001     | 0.015    |

|         |       |   |       |       |       |   |       |       |
|---------|-------|---|-------|-------|-------|---|-------|-------|
|         | 0.067 | ± | 0.001 | 0.075 | 0.070 | ± | 0.000 | 0.079 |
|         | 0.025 | ± | 0.001 | 0.015 | 0.018 | ± | 0.000 | 0.016 |
| HIS-159 | 0.546 | ± | 0.007 | 0.616 | 0.543 | ± | 0.009 | 0.620 |
|         | 0.156 | ± | 0.004 | 0.157 | 0.170 | ± | 0.003 | 0.157 |
|         | 0.120 | ± | 0.006 | 0.108 | 0.114 | ± | 0.002 | 0.101 |
|         | 0.060 | ± | 0.004 | 0.027 | 0.063 | ± | 0.002 | 0.025 |
|         | 0.077 | ± | 0.002 | 0.077 | 0.079 | ± | 0.001 | 0.081 |
|         | 0.040 | ± | 0.003 | 0.015 | 0.032 | ± | 0.004 | 0.016 |
| ILE-159 | 0.586 | ± | 0.004 | 0.523 | 0.552 | ± | 0.005 | 0.529 |
|         | 0.141 | ± | 0.002 | 0.211 | 0.150 | ± | 0.003 | 0.202 |
|         | 0.201 | ± | 0.002 | 0.194 | 0.219 | ± | 0.000 | 0.197 |
|         | 0.048 | ± | 0.001 | 0.052 | 0.052 | ± | 0.002 | 0.052 |
|         | 0.019 | ± | 0.001 | 0.017 | 0.022 | ± | 0.000 | 0.018 |
|         | 0.005 | ± | 0.000 | 0.003 | 0.005 | ± | 0.000 | 0.003 |
| LYS-57  | 0.585 | ± | 0.005 | 0.473 | 0.558 | ± | 0.007 | 0.481 |
|         | 0.084 | ± | 0.000 | 0.200 | 0.080 | ± | 0.000 | 0.185 |
|         | 0.261 | ± | 0.004 | 0.224 | 0.283 | ± | 0.005 | 0.233 |
|         | 0.025 | ± | 0.000 | 0.066 | 0.025 | ± | 0.001 | 0.061 |
|         | 0.040 | ± | 0.001 | 0.031 | 0.049 | ± | 0.001 | 0.034 |
|         | 0.002 | ± | 0.000 | 0.005 | 0.002 | ± | 0.000 | 0.005 |
|         | 0.002 | ± | 0.000 | 0.001 | 0.003 | ± | 0.000 | 0.001 |
| LYS-159 | 0.568 | ± | 0.004 | 0.486 | 0.542 | ± | 0.006 | 0.495 |
|         | 0.136 | ± | 0.002 | 0.275 | 0.149 | ± | 0.004 | 0.260 |
|         | 0.227 | ± | 0.002 | 0.169 | 0.232 | ± | 0.000 | 0.175 |
|         | 0.043 | ± | 0.001 | 0.055 | 0.050 | ± | 0.002 | 0.055 |
|         | 0.024 | ± | 0.000 | 0.013 | 0.024 | ± | 0.000 | 0.014 |
|         | 0.003 | ± | 0.000 | 0.001 | 0.004 | ± | 0.000 | 0.002 |
| MET-57  | 0.559 | ± | 0.009 | 0.503 | 0.549 | ± | 0.004 | 0.516 |
|         | 0.219 | ± | 0.004 | 0.269 | 0.241 | ± | 0.004 | 0.257 |
|         | 0.079 | ± | 0.002 | 0.138 | 0.068 | ± | 0.001 | 0.128 |
|         | 0.083 | ± | 0.003 | 0.068 | 0.093 | ± | 0.001 | 0.073 |
|         | 0.045 | ± | 0.003 | 0.020 | 0.043 | ± | 0.001 | 0.023 |
|         | 0.015 | ± | 0.003 | 0.002 | 0.007 | ± | 0.001 | 0.003 |
| MET-159 | 0.609 | ± | 0.007 | 0.538 | 0.586 | ± | 0.005 | 0.544 |
|         | 0.215 | ± | 0.004 | 0.294 | 0.232 | ± | 0.003 | 0.284 |
|         | 0.105 | ± | 0.002 | 0.130 | 0.116 | ± | 0.001 | 0.132 |
|         | 0.060 | ± | 0.002 | 0.034 | 0.057 | ± | 0.001 | 0.036 |
|         | 0.012 | ± | 0.002 | 0.003 | 0.008 | ± | 0.000 | 0.003 |
| PHE-57  | 0.469 | ± | 0.004 | 0.480 | 0.452 | ± | 0.002 | 0.484 |
|         | 0.116 | ± | 0.001 | 0.114 | 0.118 | ± | 0.000 | 0.111 |
|         | 0.114 | ± | 0.002 | 0.110 | 0.121 | ± | 0.001 | 0.110 |
|         | 0.148 | ± | 0.000 | 0.140 | 0.151 | ± | 0.001 | 0.136 |
|         | 0.076 | ± | 0.001 | 0.086 | 0.082 | ± | 0.001 | 0.089 |
|         | 0.033 | ± | 0.000 | 0.032 | 0.034 | ± | 0.000 | 0.031 |
|         | 0.025 | ± | 0.001 | 0.021 | 0.025 | ± | 0.000 | 0.021 |
|         | 0.012 | ± | 0.000 | 0.013 | 0.013 | ± | 0.000 | 0.013 |
|         | 0.004 | ± | 0.000 | 0.002 | 0.003 | ± | 0.000 | 0.002 |

|         |       |   |       |       |       |   |       |       |
|---------|-------|---|-------|-------|-------|---|-------|-------|
|         | 0.003 | ± | 0.000 | 0.002 | 0.003 | ± | 0.000 | 0.002 |
| PHE-85  | 0.481 | ± | 0.003 | 0.486 | 0.467 | ± | 0.002 | 0.490 |
|         | 0.108 | ± | 0.001 | 0.118 | 0.111 | ± | 0.000 | 0.116 |
|         | 0.195 | ± | 0.002 | 0.188 | 0.201 | ± | 0.001 | 0.188 |
|         | 0.082 | ± | 0.001 | 0.070 | 0.080 | ± | 0.001 | 0.065 |
|         | 0.078 | ± | 0.001 | 0.087 | 0.084 | ± | 0.001 | 0.090 |
|         | 0.025 | ± | 0.000 | 0.023 | 0.026 | ± | 0.000 | 0.022 |
|         | 0.023 | ± | 0.000 | 0.024 | 0.025 | ± | 0.000 | 0.025 |
|         | 0.004 | ± | 0.000 | 0.002 | 0.004 | ± | 0.000 | 0.002 |
|         | 0.003 | ± | 0.000 | 0.002 | 0.003 | ± | 0.000 | 0.002 |
| PHEf302 | 0.806 | ± | 0.002 | 0.820 | 0.796 | ± | 0.001 | 0.820 |
|         | 0.054 | ± | 0.001 | 0.025 | 0.062 | ± | 0.001 | 0.024 |
|         | 0.140 | ± | 0.002 | 0.155 | 0.143 | ± | 0.001 | 0.155 |
| PRO-15  | 0.576 | ± | 0.004 | 0.523 | 0.557 | ± | 0.006 | 0.529 |
|         | 0.158 | ± | 0.002 | 0.211 | 0.162 | ± | 0.001 | 0.202 |
|         | 0.185 | ± | 0.002 | 0.194 | 0.192 | ± | 0.004 | 0.197 |
|         | 0.060 | ± | 0.001 | 0.052 | 0.065 | ± | 0.001 | 0.052 |
|         | 0.017 | ± | 0.000 | 0.017 | 0.018 | ± | 0.000 | 0.018 |
|         | 0.005 | ± | 0.000 | 0.003 | 0.007 | ± | 0.000 | 0.003 |
| PRO-85  | 0.621 | ± | 0.003 | 0.584 | 0.605 | ± | 0.003 | 0.595 |
|         | 0.163 | ± | 0.002 | 0.213 | 0.164 | ± | 0.000 | 0.193 |
|         | 0.179 | ± | 0.002 | 0.160 | 0.190 | ± | 0.003 | 0.171 |
|         | 0.025 | ± | 0.000 | 0.034 | 0.028 | ± | 0.001 | 0.031 |
|         | 0.012 | ± | 0.000 | 0.008 | 0.013 | ± | 0.000 | 0.010 |
| PRO-159 | 0.620 | ± | 0.003 | 0.584 | 0.602 | ± | 0.004 | 0.595 |
|         | 0.159 | ± | 0.001 | 0.213 | 0.162 | ± | 0.000 | 0.193 |
|         | 0.182 | ± | 0.001 | 0.160 | 0.193 | ± | 0.003 | 0.171 |
|         | 0.026 | ± | 0.000 | 0.034 | 0.028 | ± | 0.001 | 0.031 |
|         | 0.013 | ± | 0.000 | 0.008 | 0.015 | ± | 0.000 | 0.010 |
| SER-15  | 0.752 | ± | 0.003 | 0.798 | 0.740 | ± | 0.003 | 0.798 |
|         | 0.086 | ± | 0.002 | 0.042 | 0.098 | ± | 0.003 | 0.043 |
|         | 0.054 | ± | 0.001 | 0.017 | 0.059 | ± | 0.001 | 0.018 |
|         | 0.108 | ± | 0.002 | 0.142 | 0.103 | ± | 0.001 | 0.141 |
| SER-57  | 0.750 | ± | 0.001 | 0.798 | 0.732 | ± | 0.002 | 0.798 |
|         | 0.089 | ± | 0.001 | 0.042 | 0.102 | ± | 0.002 | 0.043 |
|         | 0.054 | ± | 0.000 | 0.017 | 0.063 | ± | 0.001 | 0.018 |
|         | 0.106 | ± | 0.001 | 0.142 | 0.103 | ± | 0.000 | 0.141 |
| SER-85  | 0.777 | ± | 0.002 | 0.809 | 0.761 | ± | 0.002 | 0.808 |
|         | 0.104 | ± | 0.000 | 0.048 | 0.123 | ± | 0.002 | 0.048 |
|         | 0.119 | ± | 0.002 | 0.144 | 0.117 | ± | 0.001 | 0.143 |
| SER-159 | 0.775 | ± | 0.001 | 0.809 | 0.761 | ± | 0.003 | 0.808 |
|         | 0.105 | ± | 0.001 | 0.048 | 0.123 | ± | 0.002 | 0.048 |
|         | 0.119 | ± | 0.002 | 0.144 | 0.116 | ± | 0.001 | 0.143 |
| SERf302 | 0.796 | ± | 0.001 | 0.820 | 0.788 | ± | 0.001 | 0.820 |
|         | 0.058 | ± | 0.001 | 0.025 | 0.066 | ± | 0.000 | 0.024 |
|         | 0.146 | ± | 0.002 | 0.155 | 0.146 | ± | 0.001 | 0.155 |
| THR-15  | 0.674 | ± | 0.003 | 0.605 | 0.661 | ± | 0.003 | 0.620 |

|         |       |   |       |       |       |   |       |       |
|---------|-------|---|-------|-------|-------|---|-------|-------|
|         | 0.147 | ± | 0.002 | 0.202 | 0.156 | ± | 0.002 | 0.184 |
|         | 0.070 | ± | 0.002 | 0.125 | 0.057 | ± | 0.001 | 0.117 |
|         | 0.095 | ± | 0.002 | 0.056 | 0.104 | ± | 0.001 | 0.064 |
|         | 0.014 | ± | 0.001 | 0.012 | 0.022 | ± | 0.001 | 0.015 |
| THR-57  | 0.674 | ± | 0.004 | 0.605 | 0.653 | ± | 0.006 | 0.620 |
|         | 0.142 | ± | 0.002 | 0.202 | 0.160 | ± | 0.005 | 0.184 |
|         | 0.077 | ± | 0.001 | 0.125 | 0.059 | ± | 0.001 | 0.117 |
|         | 0.092 | ± | 0.001 | 0.056 | 0.109 | ± | 0.001 | 0.064 |
|         | 0.014 | ± | 0.001 | 0.012 | 0.019 | ± | 0.001 | 0.015 |
| THR-85  | 0.709 | ± | 0.004 | 0.647 | 0.686 | ± | 0.005 | 0.654 |
|         | 0.144 | ± | 0.003 | 0.223 | 0.154 | ± | 0.004 | 0.210 |
|         | 0.120 | ± | 0.002 | 0.111 | 0.132 | ± | 0.001 | 0.116 |
|         | 0.027 | ± | 0.000 | 0.019 | 0.027 | ± | 0.002 | 0.020 |
| TYR-57  | 0.470 | ± | 0.003 | 0.480 | 0.455 | ± | 0.001 | 0.484 |
|         | 0.114 | ± | 0.001 | 0.114 | 0.114 | ± | 0.001 | 0.111 |
|         | 0.116 | ± | 0.001 | 0.110 | 0.121 | ± | 0.001 | 0.110 |
|         | 0.147 | ± | 0.001 | 0.140 | 0.150 | ± | 0.002 | 0.136 |
|         | 0.078 | ± | 0.001 | 0.086 | 0.082 | ± | 0.001 | 0.089 |
|         | 0.033 | ± | 0.000 | 0.032 | 0.034 | ± | 0.000 | 0.031 |
|         | 0.023 | ± | 0.000 | 0.021 | 0.024 | ± | 0.000 | 0.021 |
|         | 0.012 | ± | 0.000 | 0.013 | 0.013 | ± | 0.001 | 0.013 |
|         | 0.003 | ± | 0.000 | 0.002 | 0.004 | ± | 0.000 | 0.002 |
|         | 0.003 | ± | 0.000 | 0.002 | 0.004 | ± | 0.000 | 0.002 |
| TYR-159 | 0.474 | ± | 0.004 | 0.486 | 0.461 | ± | 0.003 | 0.490 |
|         | 0.107 | ± | 0.001 | 0.118 | 0.107 | ± | 0.001 | 0.116 |
|         | 0.195 | ± | 0.002 | 0.188 | 0.202 | ± | 0.001 | 0.188 |
|         | 0.083 | ± | 0.001 | 0.070 | 0.083 | ± | 0.001 | 0.065 |
|         | 0.080 | ± | 0.001 | 0.087 | 0.087 | ± | 0.001 | 0.090 |
|         | 0.027 | ± | 0.001 | 0.023 | 0.026 | ± | 0.001 | 0.022 |
|         | 0.024 | ± | 0.000 | 0.024 | 0.025 | ± | 0.001 | 0.025 |
|         | 0.005 | ± | 0.000 | 0.002 | 0.005 | ± | 0.000 | 0.002 |
|         | 0.005 | ± | 0.000 | 0.002 | 0.005 | ± | 0.000 | 0.002 |
| VAL-15  | 0.640 | ± | 0.005 | 0.646 | 0.626 | ± | 0.004 | 0.645 |
|         | 0.082 | ± | 0.003 | 0.072 | 0.079 | ± | 0.002 | 0.073 |
|         | 0.140 | ± | 0.002 | 0.131 | 0.147 | ± | 0.002 | 0.131 |
|         | 0.108 | ± | 0.002 | 0.121 | 0.117 | ± | 0.001 | 0.121 |
|         | 0.011 | ± | 0.001 | 0.009 | 0.011 | ± | 0.001 | 0.009 |
|         | 0.019 | ± | 0.001 | 0.020 | 0.020 | ± | 0.001 | 0.020 |
| VAL-57  | 0.638 | ± | 0.003 | 0.646 | 0.626 | ± | 0.003 | 0.645 |
|         | 0.079 | ± | 0.001 | 0.072 | 0.077 | ± | 0.001 | 0.073 |
|         | 0.140 | ± | 0.001 | 0.131 | 0.146 | ± | 0.001 | 0.131 |
|         | 0.116 | ± | 0.001 | 0.121 | 0.121 | ± | 0.001 | 0.121 |
|         | 0.008 | ± | 0.000 | 0.009 | 0.008 | ± | 0.000 | 0.009 |
|         | 0.020 | ± | 0.001 | 0.020 | 0.021 | ± | 0.000 | 0.020 |
| VAL-85  | 0.653 | ± | 0.002 | 0.654 | 0.646 | ± | 0.002 | 0.654 |
|         | 0.072 | ± | 0.000 | 0.077 | 0.066 | ± | 0.001 | 0.078 |
|         | 0.241 | ± | 0.003 | 0.235 | 0.251 | ± | 0.002 | 0.234 |

|          |       |   |       |       |       |   |       |       |
|----------|-------|---|-------|-------|-------|---|-------|-------|
|          | 0.013 | ± | 0.000 | 0.014 | 0.013 | ± | 0.001 | 0.014 |
|          | 0.022 | ± | 0.000 | 0.021 | 0.024 | ± | 0.000 | 0.021 |
| VAL-159  | 0.650 | ± | 0.003 | 0.654 | 0.638 | ± | 0.001 | 0.654 |
|          | 0.067 | ± | 0.000 | 0.077 | 0.063 | ± | 0.000 | 0.078 |
|          | 0.239 | ± | 0.002 | 0.235 | 0.253 | ± | 0.001 | 0.234 |
|          | 0.022 | ± | 0.000 | 0.014 | 0.022 | ± | 0.000 | 0.014 |
|          | 0.023 | ± | 0.000 | 0.021 | 0.025 | ± | 0.000 | 0.021 |
| VAL-f302 | 0.791 | ± | 0.001 | 0.820 | 0.780 | ± | 0.003 | 0.820 |
|          | 0.058 | ± | 0.000 | 0.025 | 0.063 | ± | 0.003 | 0.024 |
|          | 0.151 | ± | 0.001 | 0.155 | 0.157 | ± | 0.002 | 0.155 |



**Table S3: PCR primers used for gene cloning for overexpression and cloning of overlapping fragments for knockout.**

| Target sequence                 | Forward primer             | Reverse primer                 |
|---------------------------------|----------------------------|--------------------------------|
| <i>Overexpression</i>           |                            |                                |
| ZWF1                            | ATGACCGATACGAAAGCCG        | TTACATCTTGTGCAGCACATCG         |
| SOL3                            | ATGGTACAAATCTATTCCTATGAACG | TCAGTATTTTGAAGTAGAAACGGA       |
| GND2                            | ATGGTTGAAGCAACAGGAGA       | TTAAGCATCGTAGGTAAGTGGC         |
| RPE1                            | ATGGTCAAACCTGTTATTGCTC     | TTAATCTAAAAGCCCTTTCTTTTGGAGA   |
| MDH1                            | ATGTTGTCCACAATTGCCAAGCG    | TTATGGGTTTTGCTTAACAAACTCTTGACC |
| GDH1                            | ATGGTCCAACCACAAGAACC       | CTAAAACACATCACCTTGGGC          |
| GPD2                            | ATGTACTTAACCAGCACAGTGAG    | TTAGTCTTCCAATGCTTAACGTC        |
| <i>Deletion</i>                 |                            |                                |
| 5'ADH2                          | ACACCCCATGGCTGCTCTC        | GGCACGAATTCGCACCCCG            |
| 3'ADH2                          | ATCGGTGACTACGCTGGTATC      | CGTATCTACCGATGATGGCACC         |
| 5'ALD4                          | CAGACGTTAAGCAGATCCAC       | GAAATCGAGGAGGTATCAAG           |
| 3'ALD4                          | TGGAGTTGGGTGGTAAATC        | GACATAGTAAAGAGCGTGAG           |
| 5'GUT2                          | TATGGTTTACGAGAATGCGG       | CCTGTTAGAACTGGATTGAG           |
| 3'GUT2                          | TTCCCTTGTGTACCATGATG       | CAGATCACTTGGTACTTTG            |
| 5'PDC1                          | TGGCATTGTTTACTTCCGC        | GGTCTATGTAGCCTCTGAG            |
| 3'PDC1                          | TGCTTCACCACACCCTCGG        | AACGATACCGAAAGCAGAGG           |
| <i>Verification of deletion</i> |                            |                                |
| ADH2                            | AATGATTATGTAAGAAGAGG       | CAGAGGCTAGTTGAATTGAG           |
| ALD4                            | AGAAGCGACAATGGGATAAC       | GAAGACGCACAATGACTAGG           |
| GUT2                            | GAAACTCGAATCATTGCAGC       | GTAGTTGGAAGCTAAATGAG           |
| PDC1                            | TTTCCGGCTAGTCAATCTCG       | CAGATACGTGGGTTGGGAAT           |
